# Supplementary material for: Patterned mechanical feedback establishes a global myosin gradient
Source: PubMed Central journal article supplement (PMC9672098; doi:10.1038/s41467-022-34518-9), 2022-11-17
Supplement: 41467_2022_34518_MOESM2_ESM.pdf [file 41467_2022_34518_MOESM2_ESM.pdf]

## **Description of Additional Supplementary Files**

File Name: Supplementary Movie 1

Description: Single cell tracking of cell edges.
